# Supplementary material
Source: PubMed Central journal article supplement (PMC4412769)

A. Shell

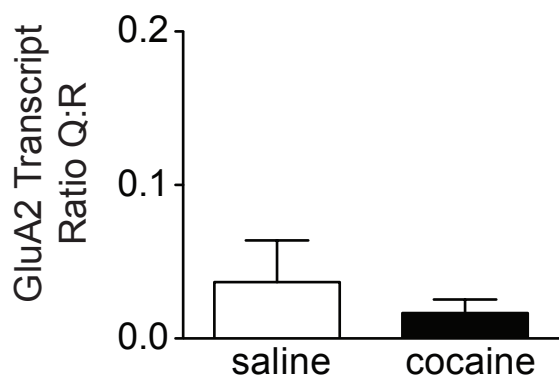

B. Core

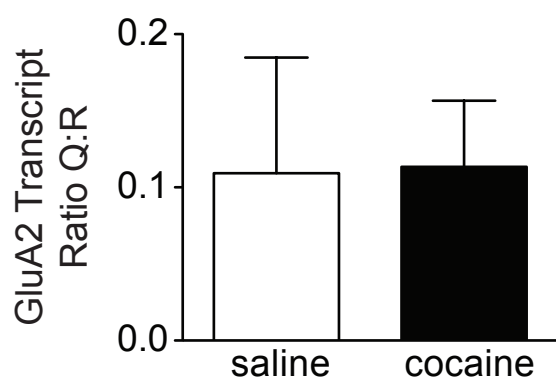

Supplement: NIHMS647394-supplement-1.pdf [file NIHMS647394-supplement-1.pdf]
